# Supplementary material for: A Morphological Study of Solvothermally Grown SnO2 Nanostructures for Application in Perovskite Solar Cells
Source: MDPI journal article supplement (doi:10.3390/nano12101686), 2022-05-15
Supplement: s1 [file s1]

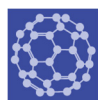

# A Morphological Study of Solvothermally Grown SnO<sub>2</sub> Nanostructures for Application in Perovskite Solar Cells

Zhuldyz Yelzhanova <sup>1,†</sup>, Gaukhar Nigmatova <sup>2,†</sup>, Damir Aidarkhanov <sup>1</sup>, Bayan Daniyar <sup>1</sup>, Bakhytzhan Baptayev <sup>3</sup>, Mannix P. Balanay <sup>4</sup>, Askhat N. Jumabekov <sup>5</sup> and Annie Ng <sup>1,\*</sup>

<sup>1</sup> Department of Electrical and Computer Engineering, School of Engineering and Digital Sciences, Nazarbayev University, Kabanbay Batyr Ave. 53, Nur-Sultan 010000, Kazakhstan; zhuldyz.yelzhanova@nu.edu.kz (Z.Y.); aidarkhanov@nu.edu.kz (D.A.); bayan.daniyar@nu.edu.kz (B.D.)

<sup>2</sup> Department of Chemical and Materials Engineering, School of Engineering and Digital Sciences, Nazarbayev University, Kabanbay Batyr Ave. 53, Nur-Sultan 010000, Kazakhstan; gaukhar.nigmatova@nu.edu.kz

<sup>3</sup> National Laboratory Astana, Kabanbay Batyr Ave. 53, Nur-Sultan 010000, Kazakhstan; bbaptayev@nu.edu.kz

<sup>4</sup> Department of Chemistry, School of Sciences and Humanities, Nazarbayev University, Kabanbay Batyr Ave. 53, Nur-Sultan 010000, Kazakhstan; mannix.balanay@nu.edu.kz

<sup>5</sup> Department of Physics, School of Sciences and Humanities, Nazarbayev University, Kabanbay Batyr Ave. 53, Nur-Sultan 010000, Kazakhstan; askhat.jumabekov@nu.edu.kz

\* Correspondence: annie.ng@nu.edu.kz

† These authors contributed equally to this work.

**Table S1.** The dimensions of SnO<sub>2</sub> nanostructures grown in different pressure by using different sizes of autoclave reactors.

| Condition        | Length (nm) |          |                | Diameter of SnO <sub>2</sub> Bundle (nm) |          |                |
|------------------|-------------|----------|----------------|------------------------------------------|----------|----------------|
|                  | Min (nm)    | Max (nm) | Mean ± SD (nm) | Min (nm)                                 | Max (nm) | Mean ± SD (nm) |
| -                |             |          |                |                                          |          |                |
| 25 mL, 130 psi   | 383         | 478      | 425±21         | 1092                                     | 1484     | 1220±140       |
| 50 mL, 87 psi    | 278         | 349      | 319±19         | 244                                      | 572      | 389±82         |
| 100 mL, 72.5 psi | 108         | 156      | 131±12         | 40                                       | 112      | 60±21          |

**Table S2.** The dimensions of SnO<sub>2</sub> nanostructures grown on substrates mounted at different orientations.

| Condition | Length (nm) |          |                | Diameter of SnO <sub>2</sub> Bundle (nm) |          |                |
|-----------|-------------|----------|----------------|------------------------------------------|----------|----------------|
|           | Min (nm)    | Max (nm) | Mean ± SD (nm) | Min (nm)                                 | Max (nm) | Mean ± SD (nm) |
| -         |             |          |                |                                          |          |                |
| 45°       | 87          | 178      | 135±30         | 42                                       | 156      | 69±28          |
| 90°       | 86          | 154      | 116±21         | 42                                       | 185      | 91±41          |
| 0°        | 105         | 152      | 132±13         | 46                                       | 91       | 64±14          |

**Table S3.** The dimensions of SnO<sub>2</sub> nanostructures grown in a ternary solvent system with different DI water to ethanol ratios.

| Condition  | Length (nm)        |                    |                          | Diameter of SnO <sub>2</sub> Bundle (nm) |                    |                          |
|------------|--------------------|--------------------|--------------------------|------------------------------------------|--------------------|--------------------------|
|            | <i>Min</i><br>(nm) | <i>Max</i><br>(nm) | <i>Mean ± SD</i><br>(nm) | <i>Min</i><br>(nm)                       | <i>Max</i><br>(nm) | <i>Mean ± SD</i><br>(nm) |
| -          |                    |                    |                          |                                          |                    |                          |
| <b>1:9</b> | 79                 | 186                | 139±26                   | 47                                       | 215                | 81±42                    |
| <b>3:7</b> | 103                | 178                | 136±18                   | 50                                       | 98                 | 73±15                    |
| <b>1:1</b> | 102                | 154                | 131±16                   | 45                                       | 83                 | 61±11                    |
| <b>7:3</b> | 69                 | 129                | 100±19                   | 26                                       | 70                 | 41±12                    |
| <b>9:1</b> | 30                 | 77                 | 48±14                    | NA                                       | NA                 | NA                       |

**Table S4.** The dimensions of SnO<sub>2</sub> nanostructures grown on different types of seed layers.

| Condition                   | Length (nm)        |                    |                          |
|-----------------------------|--------------------|--------------------|--------------------------|
|                             | <i>Min</i><br>(nm) | <i>Max</i><br>(nm) | <i>Mean ± SD</i><br>(nm) |
| -                           |                    |                    |                          |
| <b>Magnetron Sputtering</b> | 104                | 155                | 128±14                   |
| <b>NP</b>                   | 102                | 200                | 164±26                   |
| <b>QD</b>                   | 72                 | 136                | 109±16                   |

**Table S5.** The dimensions of SnO<sub>2</sub> nanostructures grown in different acetic acid concentrations.

| Condition      | Length (nm)        |                    |                          |
|----------------|--------------------|--------------------|--------------------------|
|                | <i>Min</i><br>(nm) | <i>Max</i><br>(nm) | <i>Mean ± SD</i><br>(nm) |
| -              |                    |                    |                          |
| <b>6 mL</b>    | 91                 | 151                | 119±16                   |
| <b>6.5 mL</b>  | 105                | 153                | 128±13                   |
| <b>9.75 mL</b> | 55                 | 119                | 80±17                    |

**Table S6.** The dimensions of SnO<sub>2</sub> nanostructures grown with different growth durations.

| Condition        | Length (nm)        |                    |                        | Diameter of SnO <sub>2</sub> Bundle (nm) |                    |                          |
|------------------|--------------------|--------------------|------------------------|------------------------------------------|--------------------|--------------------------|
|                  | <i>Min</i><br>(nm) | <i>Max</i><br>(nm) | <i>Mean±SD</i><br>(nm) | <i>Min</i><br>(nm)                       | <i>Max</i><br>(nm) | <i>Mean ± SD</i><br>(nm) |
| -                |                    |                    |                        |                                          |                    |                          |
| <b>6 hrs</b>     | 83                 | 138                | 119±14                 | 37                                       | 109                | 62±22                    |
| <b>12 hrs</b>    | 101                | 153                | 129±16                 | 45                                       | 91                 | 65±11                    |
| <b>24 hrs</b>    | 97                 | 154                | 130±15                 | 39                                       | 146                | 79±33                    |
| <b>12+12 hrs</b> | 131                | 312                | 219±49                 | 56                                       | 202                | 109±40                   |

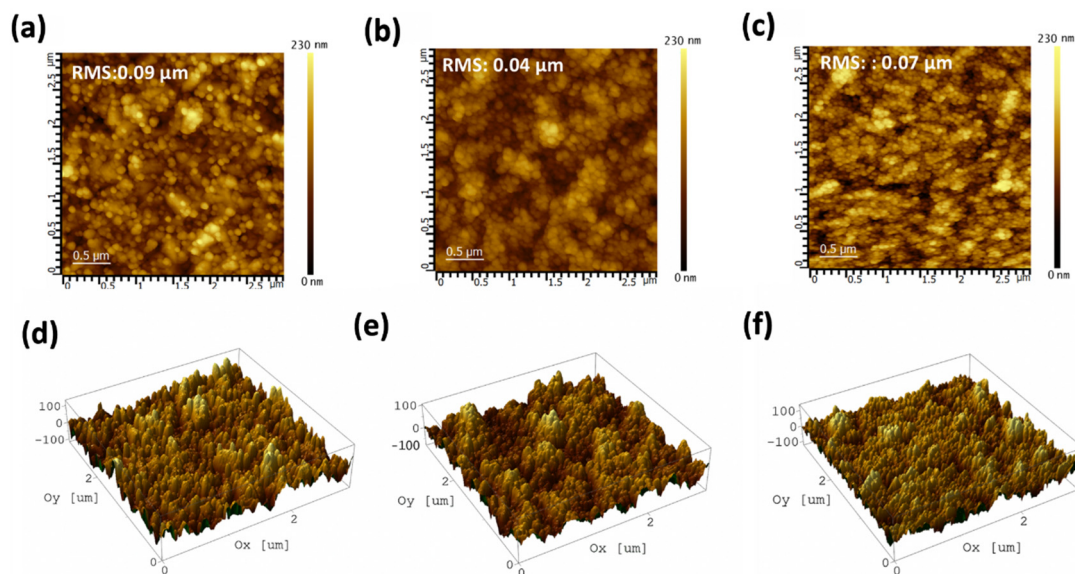

**Figure S1.** The topography of  $\text{SnO}_2$  nanorods obtained by the atomic force microscopy for the samples mounted in various orientations during solvothermal growth: (a,d)  $45^\circ$ ; (b,e)  $90^\circ$ ; (c,f)  $0^\circ$ .
